# Supplementary material for: A Single Parameter Hygroscopicity Model for Functionalized and Insoluble Aerosol Surfaces
Source: Copernicus journal article supplement (doi:10.5194/acp-2022-339), 2022-06-29
Supplement: Supplementary file 1 [file acp-2022-339-supplement.pdf]

# A Single Parameter Hygroscopicity Model for Functionalized and Insoluble Aerosol Surfaces

Chun-Ning Mao<sup>1</sup>, Kanishk Gohil<sup>1</sup> and Akua Asa-Awuku<sup>1,2</sup>

<sup>1</sup> Department of Chemical and Biomolecular Engineering, University of Maryland, College Park, MD 20742 USA

<sup>2</sup> Department of Chemistry and Biochemistry, University of Maryland, College Park, MD 20742 USA

Correspondence to: Akua A. Asa-Awuku (asaawuku@umd.edu)

## Supplementary Information

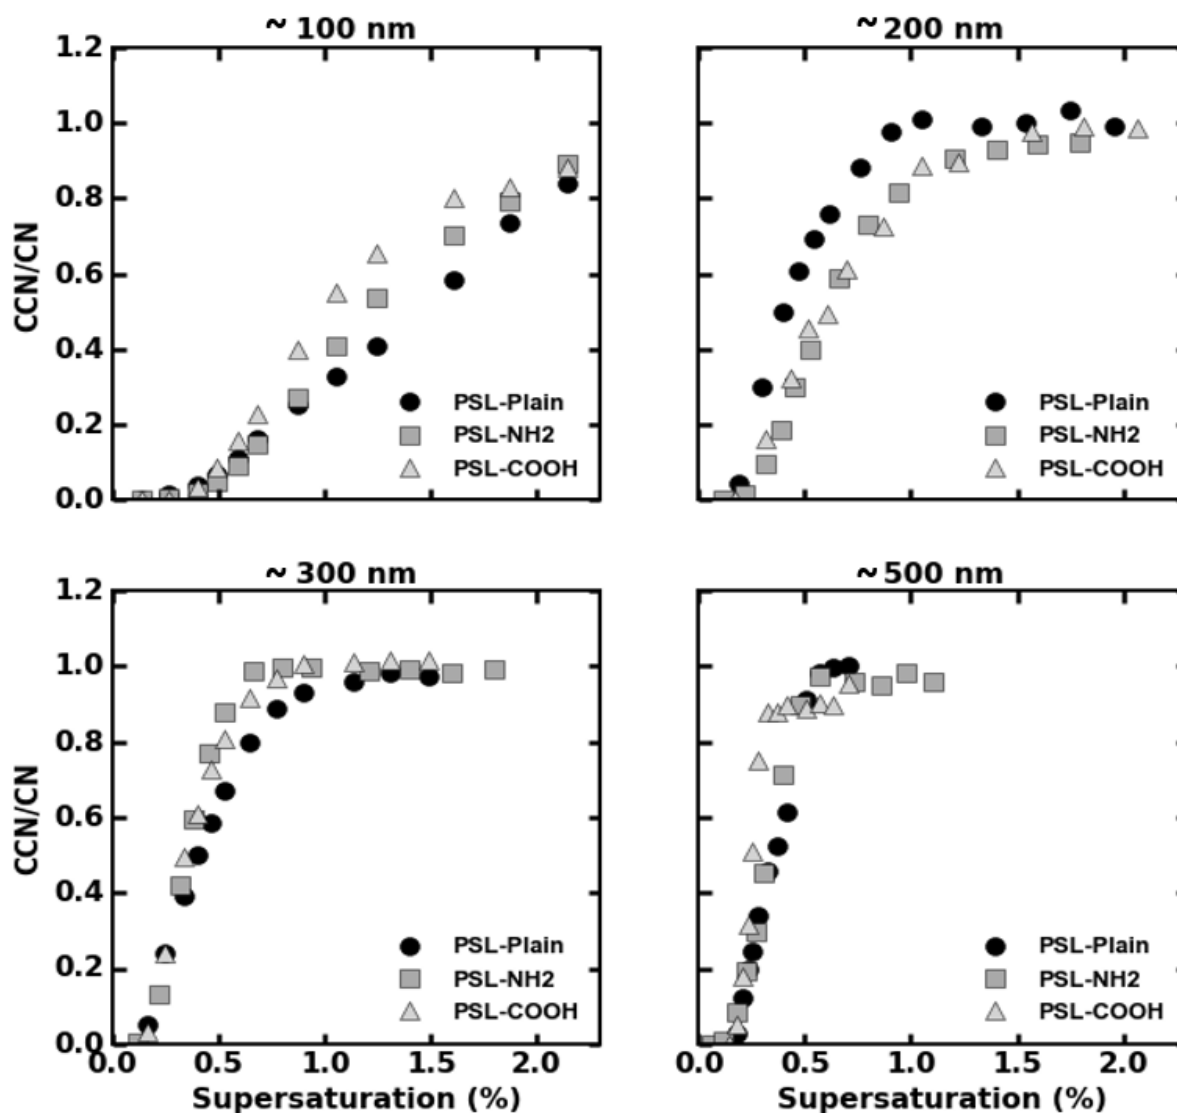

**Figure S-1.** The activation curves and raw data for PSL particles with amine group modification, carboxyl group modification and non-modification. Although the size of for different types of PSL is similar they are still not the same. Larger particles will activate earlier and therefore should not be directly compared. This is the raw data used to calculate hygroscopicity in the main manuscript.
