# Supplementary material for: A Single Parameter Hygroscopicity Model for Functionalized and Insoluble Aerosol Surfaces
Source: Copernicus journal article supplement (doi:10.5194/acp-2022-339), 2022-06-29
Supplement: Supplementary file [file acp-2022-339-AC2-supplement.pdf]

We thank the reviewers for their comments and suggestions and have provided point by point responses.

## Referee 2

The manuscript by Mao et al. quantified CCN activity of plain and surface-treated polystyrene latex (PSL) particles. The data were interpreted using the Köhler theory by considering a few different types of water-particle interactions. The authors claim that the result of the present study can be useful for interpreting CCN activation of atmospheric insoluble particles. The manuscript is well organized. It is easy to follow the story. However, I have some concerns about the data quality.

### Major comments

Commercially available solutions for PSL particles typically contain surfactants for avoiding coagulation (Kidd et al., 2014). The manuscript provides no descriptions about potential influences of surfactants on the data. The reviewer checked the website of the manufacturer of PSL particles for the present study to search for the corresponding information. It seems that the manufacturer adds some additional chemical species to stabilize the PSL solutions (if I understand it correctly). As the manuscript only provides CCN spectra in the supplement as results, it is difficult to judge the potential artifacts on the data. The reviewer is not sure how it influences the conclusion of the study. As the manuscript focuses on CCN activity of PSL particles, quantitative information on this point would be needed for evaluating the data quality. At the current moment, the reviewer is unable to judge the technical validity of the study due to the lack of this information.

We do not believe that the additive is influencing the results presented here. To address the concerns we conducted additional experiments to provide evidence to the robustness of the data presented. Specifically, We took careful consideration in selecting particles and have provided the following information to address concerns.

1. We have emphasized in the text that the reported sizes of the particles are based on the measured electrical mobility diameter. For each PSL solution and after the atomization process, we first did a scan of all aerosols within the size range of 6 to 386 nm. The reported electrical mobility diameters are based on the peak determined in these scans. Furthermore, we believe the surfactants to mainly form peaks at 20~100nm. (see the figure below). The orange line is the theoretical fit of surfactant particles. The PSL sizes selected for CCN activation in the manuscript are larger than the surfactant size distribution.

2. To provide additional evidence of the different compositions at different peaks, we measured the CCN activity of surfactant peak (size distribution) of particles with two methods. In the first method, we scanned through particle sizes in this range and measured the CCN activity at 0.8% supersaturation and found a critical diameter of 40 nm (see figure below). Using Kohler Theory we estimate that the aerosols within this size range have an estimated Kappa- hygroscopicity of  $0.28 \pm 0.05$ . The TK kappa value for this peak is 10 to 100 times larger than the measured TK hygroscopicity of PSL ranging from 0.002 to 0.02 (see Fig 2 in the manuscript). We also measured CCN activity with a second method. That is, we selected 60 nm particles and found a critical supersaturation around 0.5% by varying instrument supersaturation. With this method, we estimate the kappa hygroscopicity to be 0.4.
3. The hygroscopicity is consistent with the composition of a hydrophilic surfactant. The Material Safety Data Sheet (MSDS) suggests tween20 is the surfactant used in the solution. The behavior of the hydrophilic Tween20 is vastly different from the hydrophobic PSL particles. Compositions that readily dissolve in water, like hydrophilic salts and surfactants components do not exhibit a hygroscopicity dependence with diameter. Figure 2 in the manuscript shows that the TK hygroscopicity of the PSL peak is size dependent.
4. The reviewer suggests that there maybe contamination of the surfactant on the size selected PSL particle. We can do a quick calculation of the impact of a mixed PSL and surfactant aerosol. Let's say there is a 5% by volume mixture of Tween20. Assuming a simple ZSR, a 5% or more influence of surfactant would result in kappa values greater than 0.017. In figure 2, the majority of PSL TK measurements are less than 0.01, indicating that any contamination is much smaller than 5% and negligible. The measured hygroscopicity is size dependent and must be mainly due to non-hygroscopic PSL spheres.
5. If indeed there is some surfactant (less than 5% of the volume of the mixture), the same surfactant is used in all samples produced by the manufacturer. And thus any changes observed (even minor) can be attributed to the differences in PSL structure and composition.
6. Again, we do not believe that the size selected PSL aerosol contains surfactant. The PSL hygroscopicity measured is much smaller than the pure surfactant. The raw data (Figure S1) shows only one sigmoid curve, indicating a singular composition at the selected particle size.

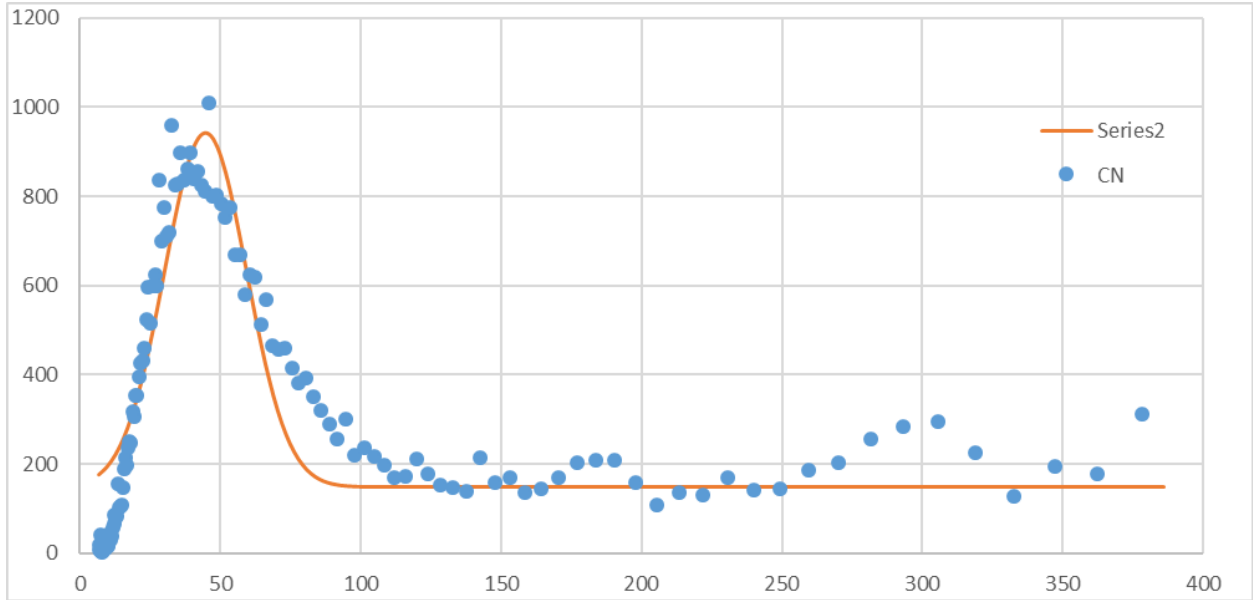

SMPS of a 300nm PSL sample. The orange line is the Gaussian fit for the small surfactant particles.

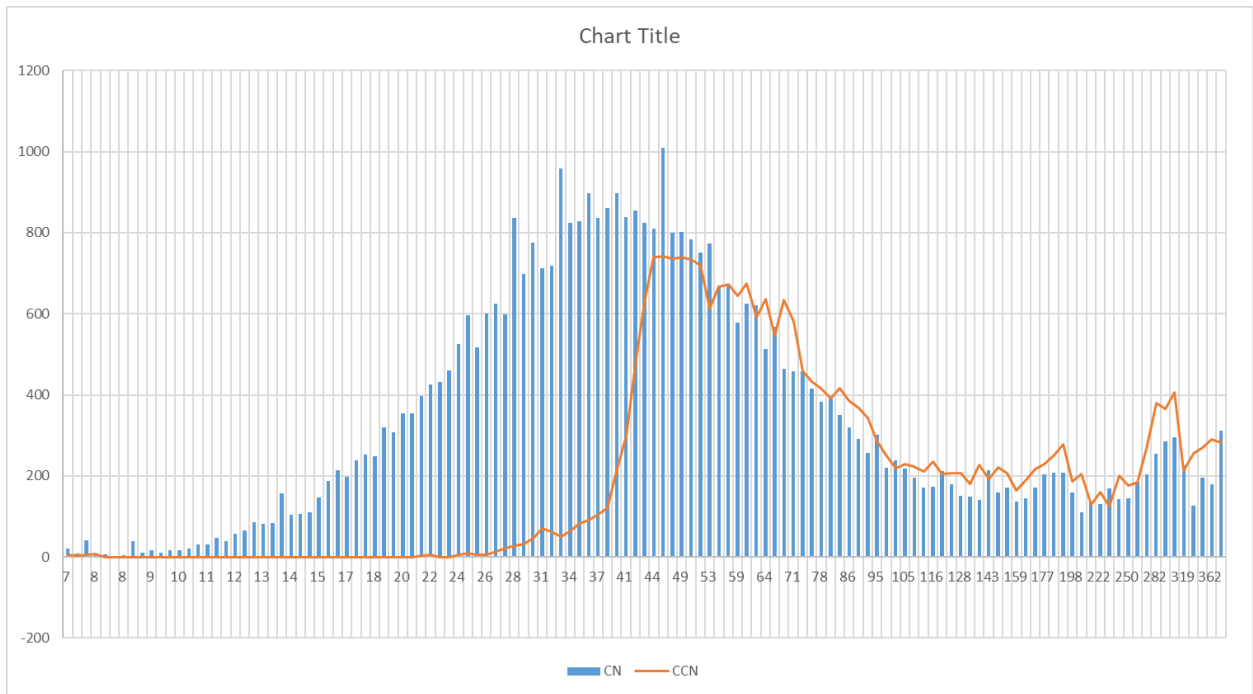

SMCA data PSL(300 nm, plain) sample at 0.8% supersaturation.

Size selection of PSL particles by the DMA should be conducted more carefully. Most of (e.g., NaCl, (NH<sub>4</sub>)<sub>2</sub>SO<sub>4</sub>) atomizer-generated particles have number size-distributions that are significantly broader than the DMA transfer function. In these cases, the setting diameter for the DMA and the mode diameter of the selected particles agree. However, standard PSL particles typically have narrow size distributions. The widths of the distributions are comparable to that of DMA transfer functions in many cases. So, it would be ideal to measure the size distributions of PSL particles using the DMA for matching the mode diameters for PSL and DMA transfer function. The manuscript describes that the authors measured the PSL particles using the DMA and CPC. However, it is not clear how the DMA diameter was finally set.

In the revised manuscript we have clarified the method for PSL size selection. In fact, in earlier drafts we had included this information and then took it out. In the revised manuscript, we emphasize that we actually double checked sizes. Furthermore, we have provided size information data. We first conducted scans over a size range between 6 nm to 386 nm. An example figure of a scan is shown below. Rather than use a tandem set-up which requires a second system to be calibrated, we use the same system to size-select the aerosol (PSL and ammonium sulfate). It is important to note that the DMA system is the same as used for calibration of the instrument supersaturation. It should also be noted that the electrical mobility diameter measured is within 10% of the manufacturer's reported aerosol diameter estimated with dynamic light scattering. Although true that the DMA transfer function is wider at larger aerosol sizes, the uncertainty in this width still indicates that the PSL will have a very low hygroscopicity (similar to that reported here). Indeed, it is reported that other sizing instrumentation (beyond that used here) maybe more suitable for larger aerosol widths (Gohil and Asa-Awuku, 2022). This is stated in Section 2.1.

As shown in the abstract, the authors concluded that the plain PSL particles are less hygroscopic than functionalized PSL particles. Figure S1 shows the experimental data for the study. I agree with the statement for 100 nm particles. However, the data for 200 nm particles exhibit an opposite trend. A clear explanation would be needed.

As stated in the caption for figure S1. "Larger particles will activate earlier and therefore should not be directly compared". As previously mentioned the sizes of particles purchased were re-measured with the DMA. Thus ~200 sized particles of PSL were, 250nm (plain) 223 nm (PSL-COOH), and 195 nm (PSL-NH<sub>2</sub>). Larger particles provide more surface area for water to condense, and hence the corresponding activation data for plain PSL with larger sizes will appear to be more active than PSL-COOH and PSL-NH<sub>2</sub>. We thought about this deeply. Including the raw data activation figure of

different sized particles is misleading. We have indicated that for the supplemental graphs, readers should refer to the measured electrical mobility diameters provided in the main manuscript. The best way to do a direct comparison of the activation is with either sc-dd pairs or with hygroscopicity parameters (hence Figures 1 and Figures 2). In this paper, we focus on the surface property contribution to the hygroscopicity but not the particle size. Hence we developed the hygroscopicity based on the adsorption theory.

Minor comments

L114 Silicone dryers

Silicagel dryers?

Corrected. The sentence now read:

“Wet droplets were then passed through two silica gel dryers and the relative humidity was 5% after passing through the dryers.”

L207

I agree that the data suggest the PSL particles for the present study look like hygroscopic based on the data. Does it agree with identified bulk property of PSL?

Overall the PSL are not very hygroscopic. However Yes, the findings are consistent with what we know of PSL; the bulk property of plain PSL is hydrophobic and water-insoluble. The surface of the PSL can be modified either hydrophilic or hydrophobic.
